# Supplementary material for: Transcriptional Induction of Cystathionine γ-Lyase, a Reactive Sulfur-Producing Enzyme, by Copper Diethyldithiocarbamate in Cultured Vascular Endothelial Cells
Source: MDPI journal article supplement (doi:10.3390/ijms21176053), 2020-08-22
Supplement: s1 [file s1]

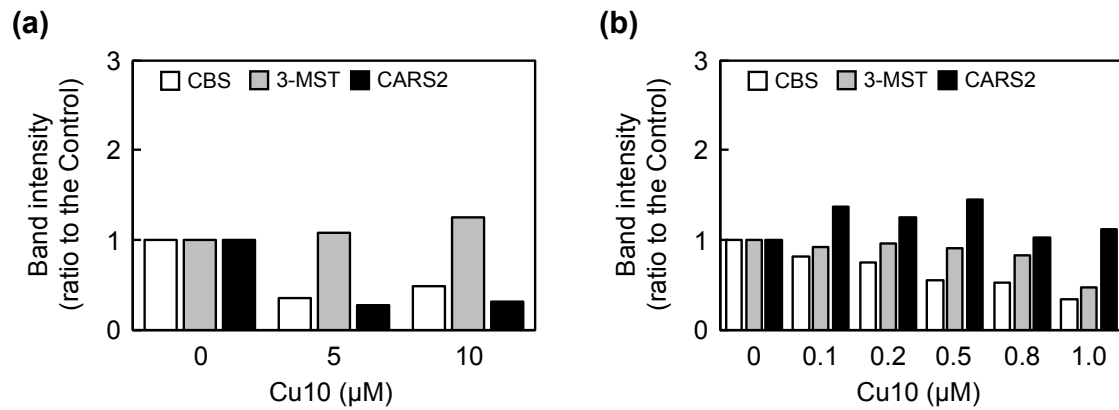

**Figure S1.** The expression of CBS, 3-MST, and CARS2 in (a) dense and (b) sparse vascular endothelial cells after treatment with Cu10. The ratio of the intensity of CBS, 3-MST, and CARS2 in Figure 1D to those of GAPDH; values are means of two replicates from two independent experiments.

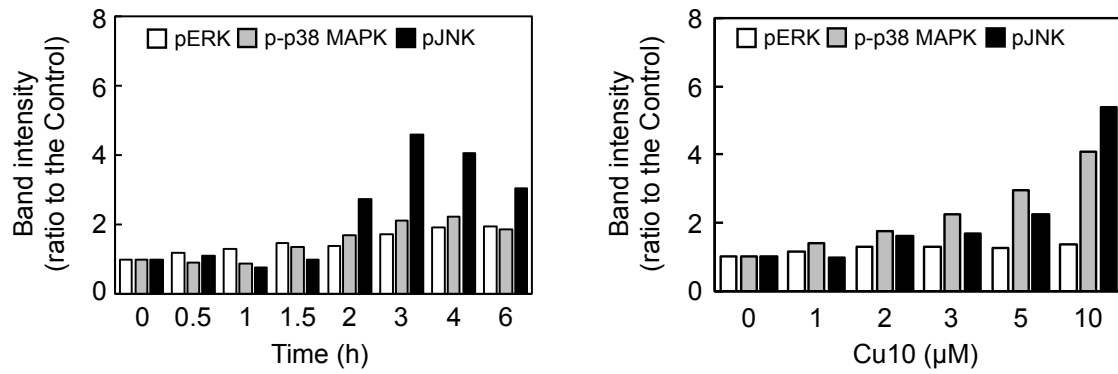

**Figure S2.** Phosphorylation of ERK1/2, p38 MAPK, and JNK in vascular endothelial cells after treatment with Cu10. The ratio of the intensity of p-ERK1/2, p-p38 MAPK, and p-JNK in Figure 3A to those of ERK1/2, p38 MAPK, and JNK, respectively; values are means of two replicates from two independent experiments.

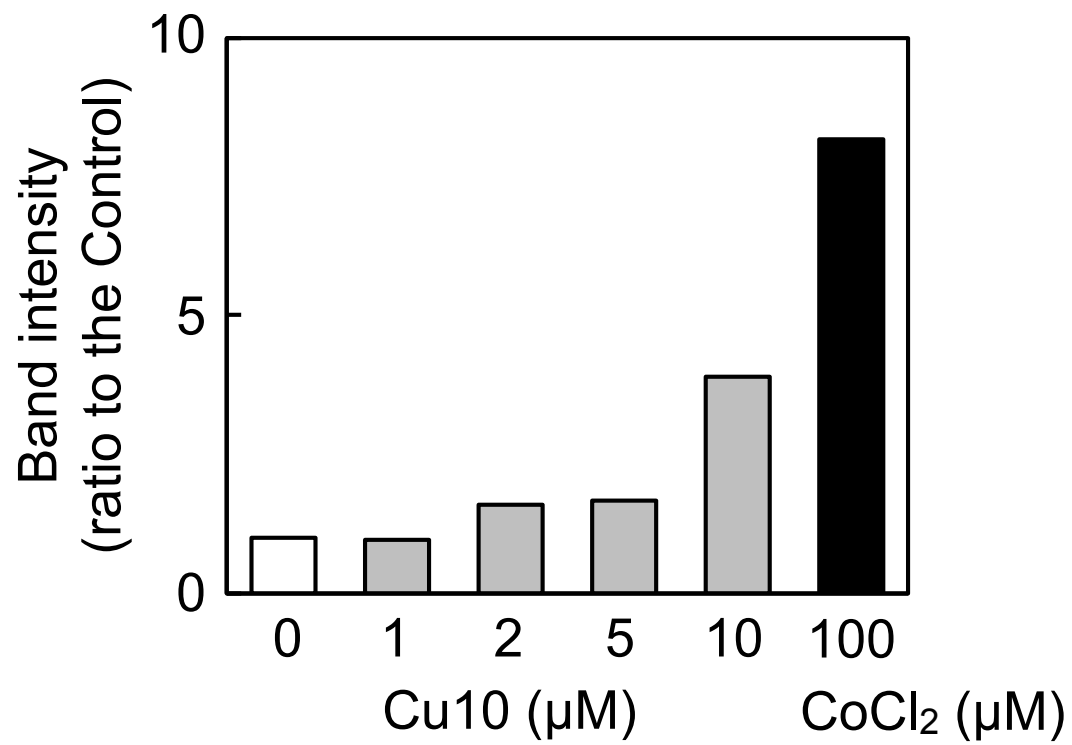

**Figure S3.** The expression of HIF1 $\alpha$  protein in vascular endothelial cells treated with Cu10. The ratio of the intensity of HIF-1 $\alpha$  in Figure 4A to that of GAPDH; values are means of two replicates from two independent experiments.

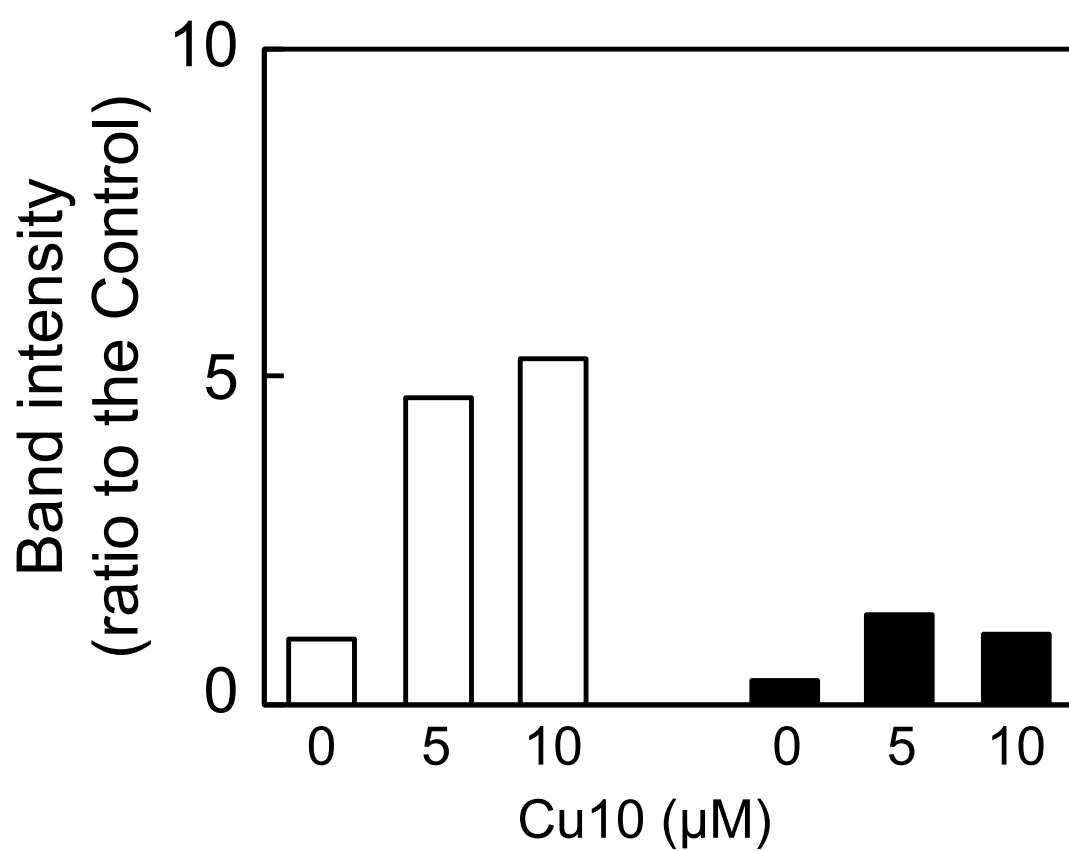

**Figure S4.** The expression of Nrf2 protein in vascular endothelial cells treated with Cu10. The ratio of the intensity of Nrf2 in Figure 5B to that of  $\beta$ -actin; values are means of two replicates from two independent experiments.

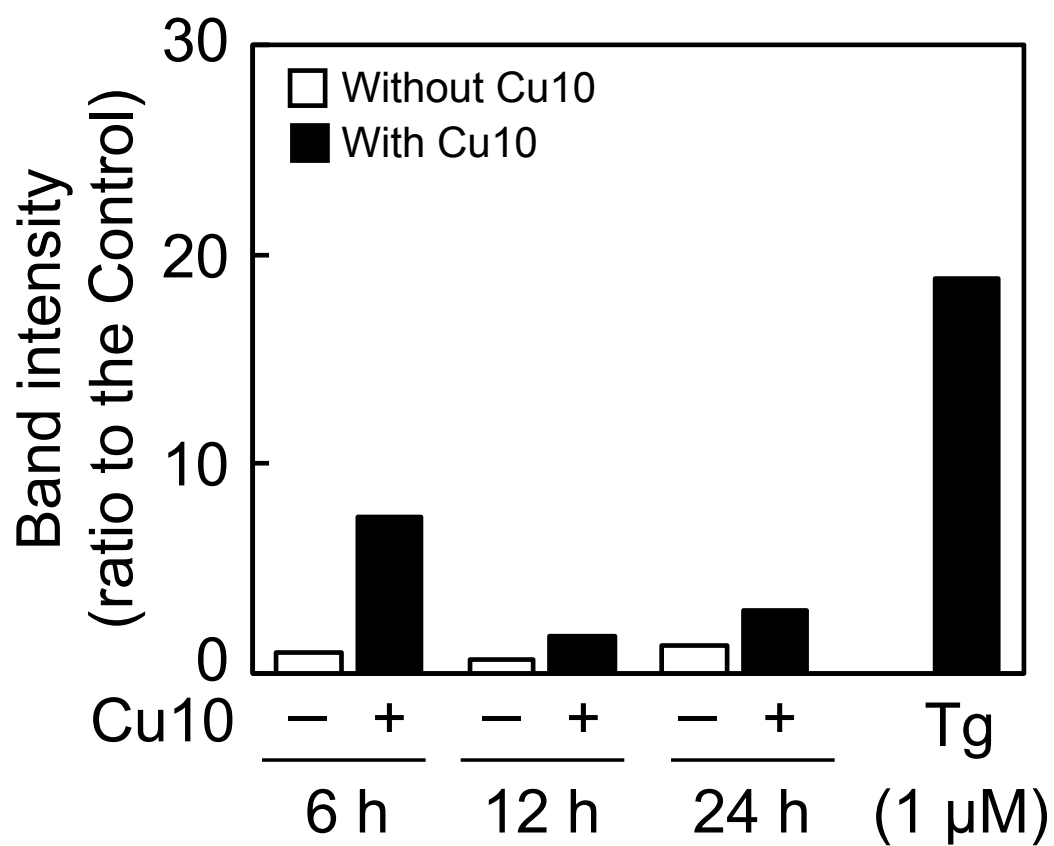

**Figure S5.** The expression of ATF4 protein in the nuclear fraction of vascular endothelial cells treated with Cu10. The ratio of the intensity of ATF4 in Figure 5E to that of Lamin A/C; values are means of two replicates from two independent experiments.
